# Supplementary material for: Factors determining microbial colonization of liquid nitrogen storage tanks used for archiving biological samples
Source: PubMed Central journal article supplement (PMC6942587; doi:10.1007/s00253-019-10242-1), 2019-11-28
Supplement: 253_2019_10242_MOESM1_ESM.pdf [file 253_2019_10242_MOESM1_ESM.pdf]

**Journal/Research topic:** Applied microbiology and biotechnology / Biotechnological products and process engineering

**Title:** Factors determining microbial colonization of liquid nitrogen storage tanks used for archiving biological samples

**Authors:** F. Bajerski<sup>1</sup>, A. Bürger<sup>2</sup>, B. Glasmacher<sup>3</sup>, E. R. J. Keller<sup>4</sup>, K. Müller<sup>5</sup>, K. Mühldorfer<sup>5</sup>, M. Nagel<sup>4</sup>, H. Rüdell<sup>6</sup>, T. Müller<sup>7</sup>, J. Schenkel<sup>8\*</sup>, & J. Overmann<sup>1,9\*#</sup>

<sup>1</sup>Leibniz Institute DSMZ-German Collection of Microorganisms and Cell Cultures, Braunschweig, Germany

<sup>2</sup>Helmholtz Zentrum München, German Research Center for Environmental Health, Institute of Developmental Genetics, München, Germany

<sup>3</sup>Leibniz Universität Hannover, Institute for Multiphase Processes, Hannover, Germany

<sup>4</sup>Leibniz Institute of Plant Genetics and Crop Plant Research (IPK), Seeland, OT Gatersleben, Germany

<sup>5</sup>Leibniz Institute for Zoo and Wildlife Research (Leibniz-IZW), Berlin, Germany

<sup>6</sup>Fraunhofer Institute for Molecular Biology and Applied Ecology IME, Schmallenberg, Germany

<sup>7</sup>BioKryo GmbH, Sulzbach, Germany

<sup>8</sup>German Cancer Research Centre, Heidelberg, Germany

<sup>9</sup>Microbiology, Braunschweig University of Technology, Braunschweig, Germany

\* Contributed equally

**#Corresponding author:**

Felizitas Bajerski

Leibniz Institute DSMZ-German Collection of Microorganisms and Cell Cultures  
Inhoffenstraße 7B

38124 Braunschweig, Germany

**Phone:** +49 (0) 531-2616-352

**Fax:** +49 (0) 531-2616-418

E-mail: [Felizitas.Bajerski@dsmz.de](mailto:Felizitas.Bajerski@dsmz.de)

**Figure S1. Effect plots of a generalized linear model with Gaussian distribution.** Effect of predictor variables on a response variable (cell numbers) after removing samples below the detection limit (leaving out institute E, J). Predictors: institute, sampled phase (phase), storage phase (storage), surrounding condition, (condition), number of openings (open\_num), usage time (in\_use). The variables storage material and storage device were included in the model as well, but their effect is redundant with the other variables. \*, significant intercept.

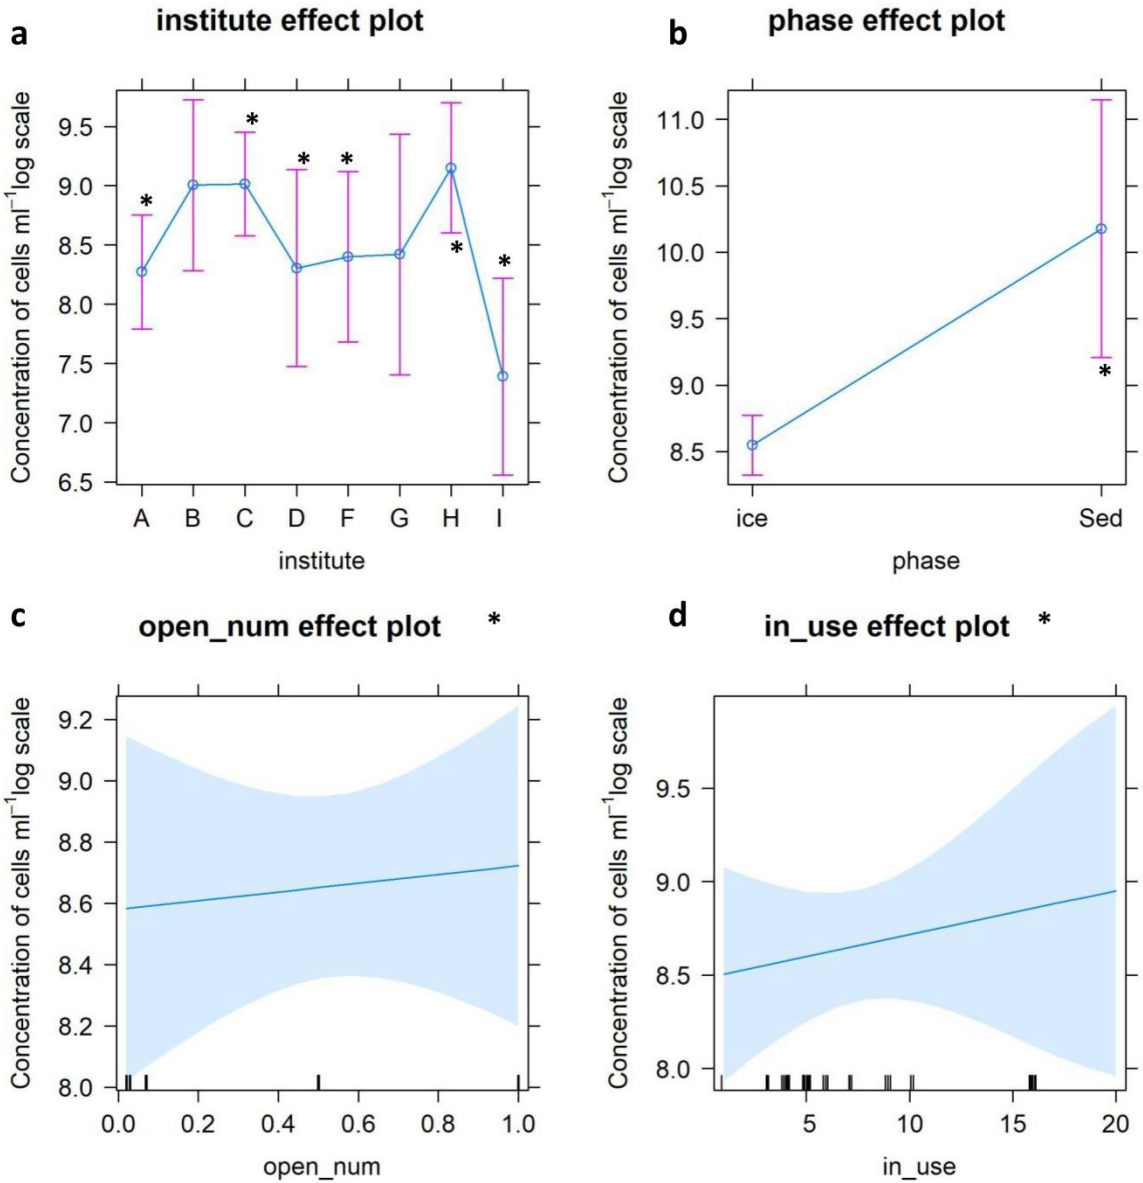



**Figure S3. Morphology of detected green algae and diatoms .** Cells of *Chlorella* spec. a) bright field color, b) autofluorescence (excitation 425 nm, emission 630 nm) of chlorophyll a. Diatoms c) pennate and d) centric. Scale bar, 10  $\mu$ m.

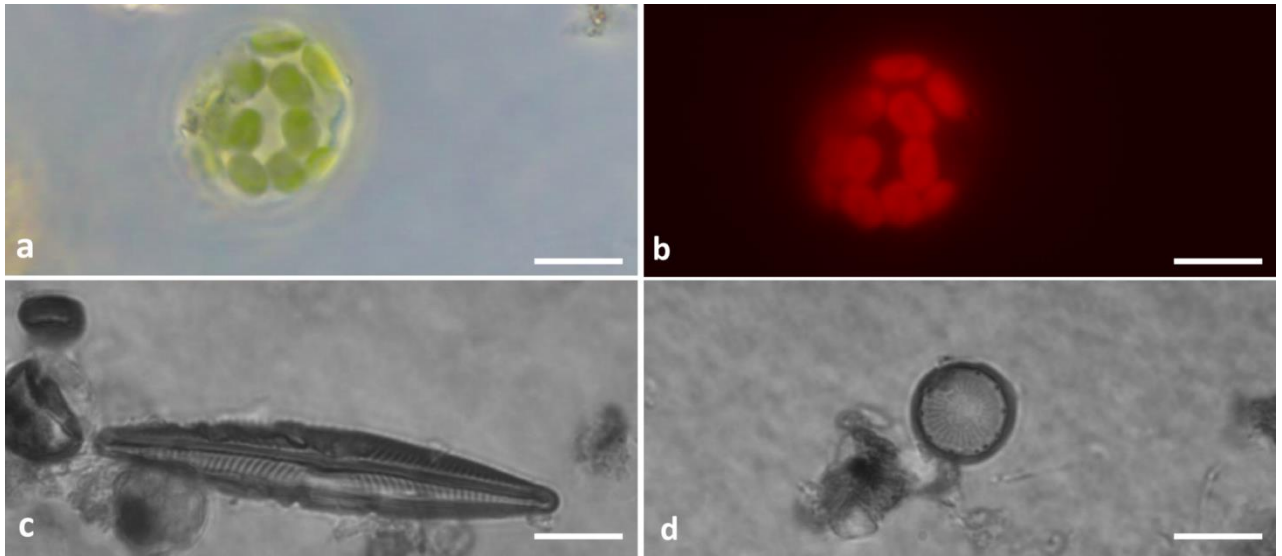

**Figure S4.** Abundance of sequences affiliated with the phylum Cyanobacteria (class Chloroplast, Cyanobacteria) in relation to the material that was stored in the liquid nitrogen (LN) storage tanks. The significance of differences of the abundance between the different groups of stored material were calculated (by ANOVA) and shown as compact letter display. NC, negative control; mio, microorganisms, plant\_mix, plant and other eukaryotes; euk, eukaryotes (animal, human).

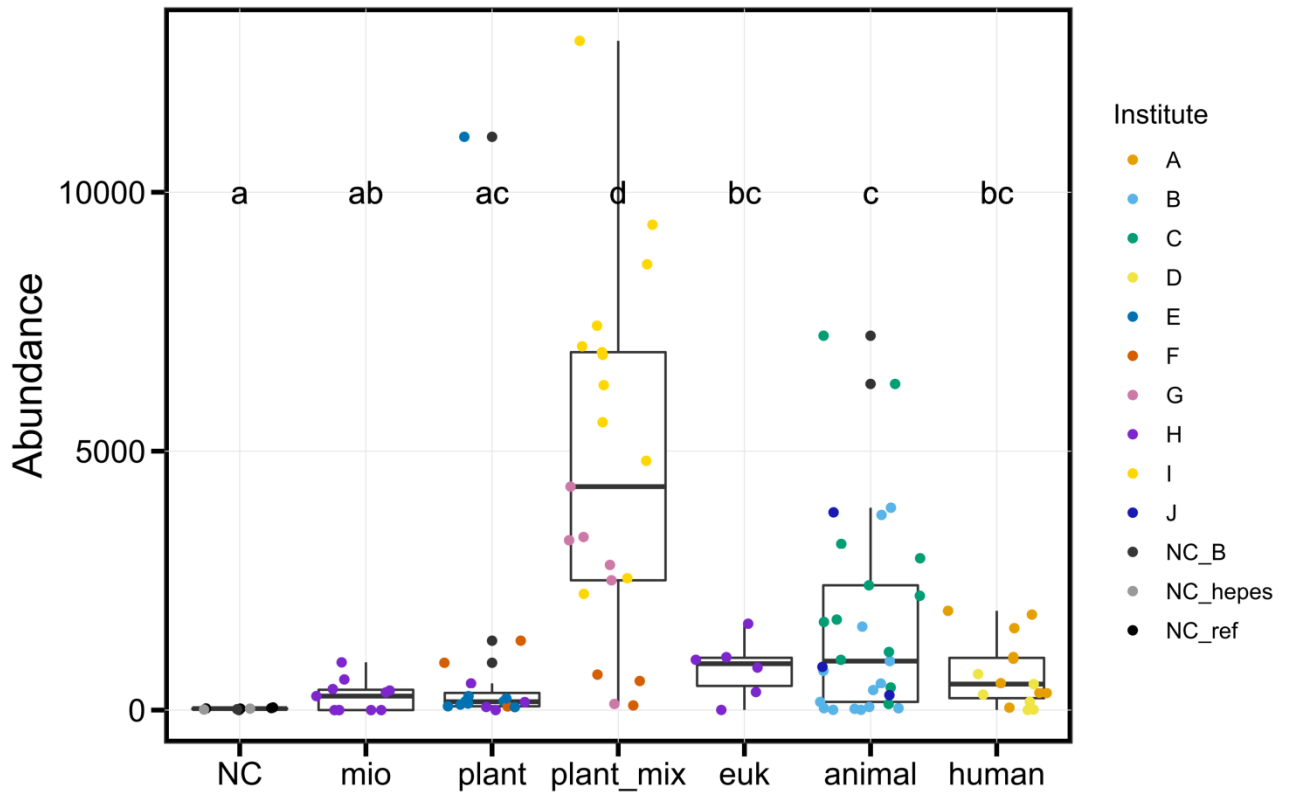

**Figure S5. Overview of  $\alpha$ -diversity measures; a) observed sequence variants, b) Chao1 and c) Shannon diversity index).** The significance of differences of the  $\alpha$ -diversity measures between the different institutes was determined by one-way-ANOVA with multiple comparisons of means using Tukey Contrasts (R package multcomp) and shown as compact letter display. A-J Identification letter of each institute. NC B, exemplary negative control of institute B; NC hepes/ NC\_h, LN reference sample including HEPES buffer; NC ref/ NC\_r, LN reference sample without HEPES buffer.

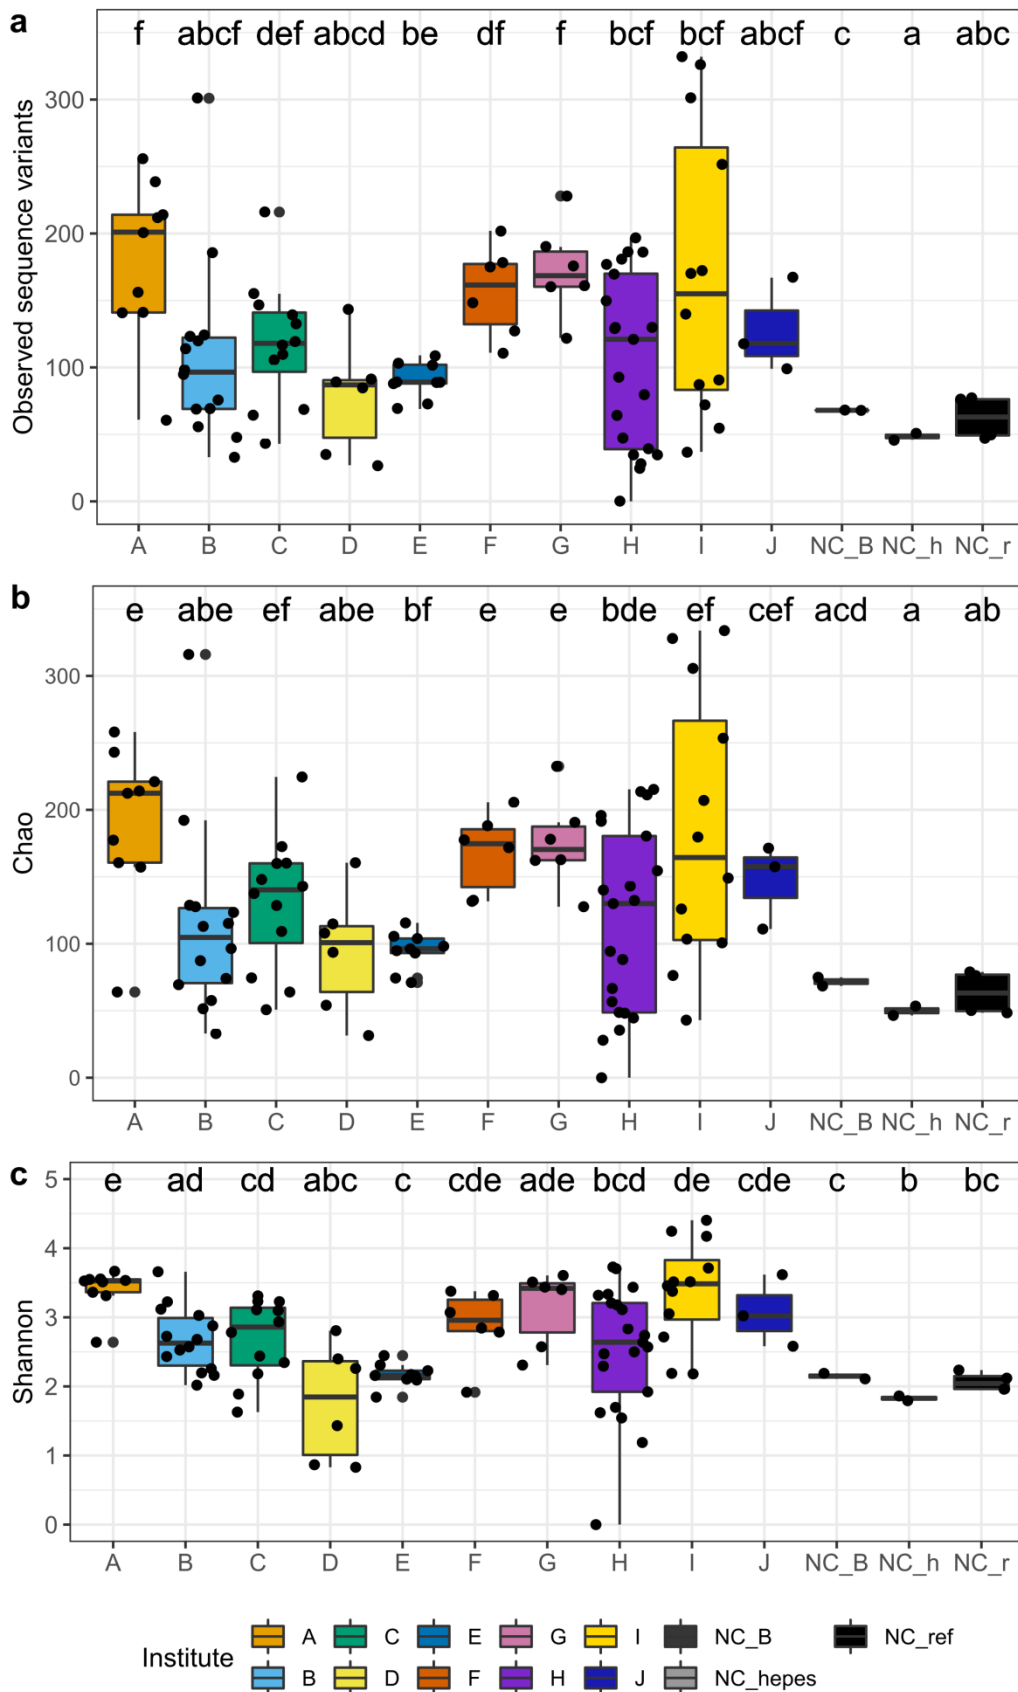

**Figure S6. Bacterial community structure at species level analyzed with principal coordinate analysis (PcOA) based on on weighted unifracs distances.** The ellipses are calculated as 95 % confidence intervals grouped by the sampled phase. The NC samples group with the LN samples according to species distribution. Shapes: Sampled phase; LN, liquid nitrogen; Deb, debris; NC, negative control. Colors: A-J, institutes; NC\_B, exemplary negative control of institute B; NC\_hepes, LN reference sample including HEPES buffer; NC\_ref, LN reference sample without HEPES buffer.

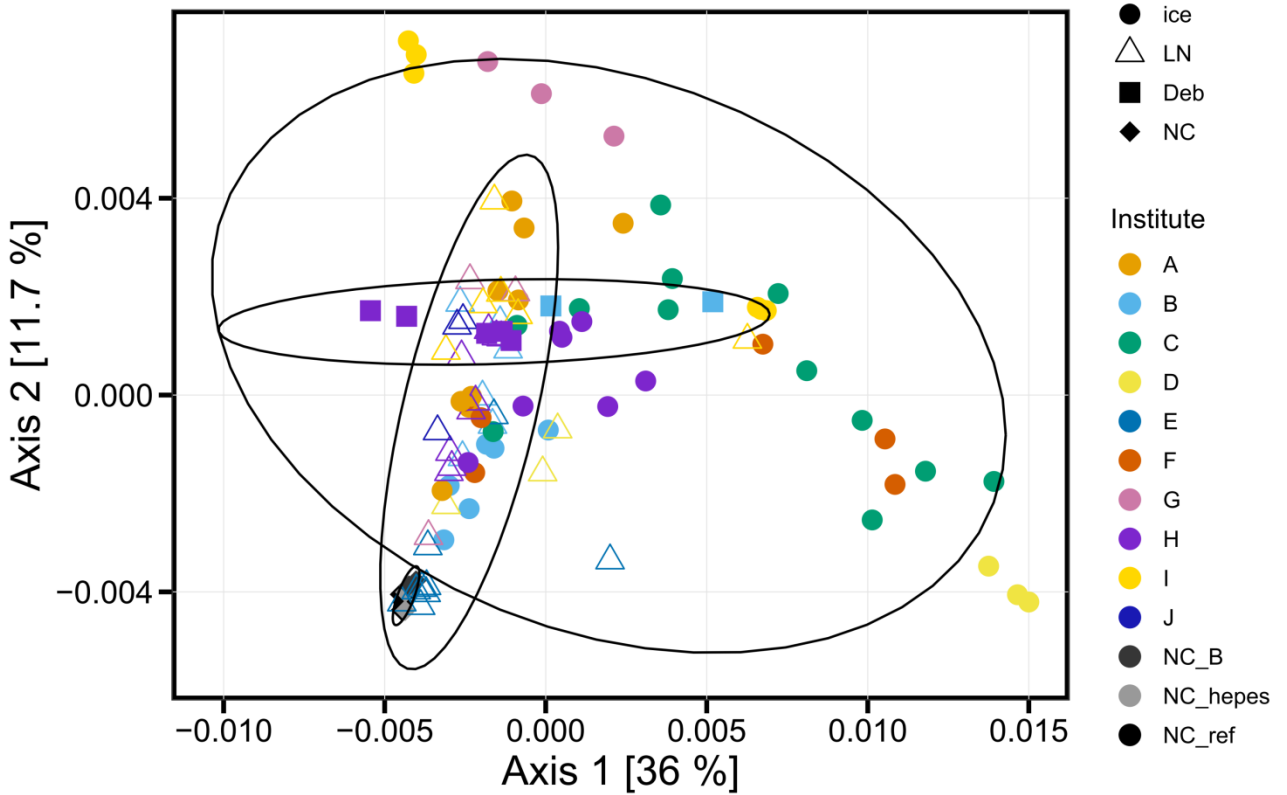





**Table S1: Overview of the participating institutes (anonymized as A-J) and metadata of the liquid nitrogen (LN) storage tanks.** ID, identification number; R, replicate; NC eq, negative controls of laboratory equipment; NC B, exemplary NC of institute B; NC HEPES, LN reference sample including HEPES buffer; NC ref, LN reference sample without HEPES buffer; Deb, Debris in the bottom of the LN storage tank; gN, gaseous phase of the LN storage tanks.

| Institute | ID | R | Sampled phase | in use (years) | Frequency of opening | Storage phase | storage device              | Stored material samples | Storage condition                   |
|-----------|----|---|---------------|----------------|----------------------|---------------|-----------------------------|-------------------------|-------------------------------------|
| A         | 1  | 3 | ice           | 9              | every second day     | gN            | bags (in metal cassettes)   | human                   | filtered air supply                 |
| A         | 2  | 3 | ice           | 4              | daily                | gN            | bags                        | human                   | filtered air supply                 |
| A         | 3  | 3 | ice           | 4              | daily                | gN            | bags                        | human                   | filtered air supply                 |
| B         | 4  | 3 | ice           | 7              | every second day     | LN            | straws (IMV, sealed)        | animal (rodent)         | air exhaust                         |
| B         | 5  | 3 | LN            | 7              | every second day     | LN            | straws (IMV, sealed)        | animal (rodent)         | air exhaust                         |
| B         | 6  | 3 | ice           | 1              | every second day     | LN            | straws (IMV, sealed)        | animal (rodent)         | air exhaust                         |
| B         | 7  | 3 | LN            | 1              | every second day     | LN            | straws (IMV, sealed)        | animal (rodent)         | air exhaust                         |
| B         | 36 | 1 | Deb           | 13             | every second day     | LN            | straws (IMV, sealed)        | animal (rodent)         | air exhaust                         |
| B         | 37 | 1 | Deb           | 30             | every second day     | LN            | straws (IMV, sealed)        | animal (rodent)         | air exhaust                         |
| C         | 8  | 3 | ice           | 6              | every second week    | gN            | tubes                       | animal (rodent)         | air exhaust                         |
| C         | 9  | 3 | ice           | 5              | every second week    | gN            | tubes                       | animal (rodent)         | air exhaust                         |
| C         | 10 | 3 | ice           | 3              | every second day     | gN            | tubes                       | animal (rodent)         | air exhaust                         |
| C         | 11 | 3 | ice           | 4              | every second day     | gN            | tubes                       | animal (rodent)         | air exhaust                         |
| D         | 12 | 3 | ice           | 5              | once a month         | gN            | bags                        | human                   | filtered air supply                 |
| D         | 13 | 3 | LN            | 5              | once a month         | gN            | straws (minitubes, Fa. MTG) | human                   | filtered air supply                 |
| E         | 14 | 3 | LN            | 24             | every second week    | LN            | tubes                       | plant                   | air supply                          |
| E         | 15 | 3 | LN            | 4              | every second day     | LN            | tubes                       | plant                   | air supply                          |
| E         | 16 | 3 | LN            | 3              | every second week    | LN            | tubes                       | plant                   | air supply                          |
| F         | 17 | 3 | ice           | 3              | seldom               | LN            | tubes                       | plant                   | filtered air supply and air exhaust |

|        |    |    |     |    |                  |     |                                             |                                                        |                                     |
|--------|----|----|-----|----|------------------|-----|---------------------------------------------|--------------------------------------------------------|-------------------------------------|
| F      | 18 | 3  | ice | 5  | seldom           | mix | mix (tubes, bags)                           | mix (plants, human)                                    | filtered air supply and air exhaust |
| G      | 19 | 3  | LN  | 17 | once a week      | LN  | tubes                                       | mix (human, animal (rodent, pig, monkey), plant)       | filtered air supply                 |
| G      | 20 | 3  | ice | 10 | every second day | gN  | tubes                                       | mix (human, animal (rodent, pig, monkey), plant)       | hall                                |
| H      | 21 | 3  | ice | 16 | daily            | mix | mix (tubes, glass capillaries, glass vials) | mix (bacteria, phages, fungi)                          | air supply and air exhaust          |
| H      | 22 | 3  | LN  | 16 | daily            | mix | mix (tubes, glass capillaries, glass vials) | mix (bacteria, phages, fungi)                          | air supply and air exhaust          |
| H      | 23 | 3  | LN  | 7  | once a week      | LN  | tubes                                       | plant                                                  | air exhaust                         |
| H      | 24 | 1  | ice | 7  | once a week      | LN  | tubes                                       | plant                                                  | air exhaust                         |
| H      | 25 | 3  | ice | 5  | every second day | mix | tubes                                       | mix (human, animal)                                    | air exhaust                         |
| H      | 26 | 3  | LN  | 2  | every second day | mix | tubes                                       | mix (human, animal)                                    | air exhaust                         |
| H      | 32 | 5  | Deb | 16 | daily            | mix | mix (tubes, glass capillaries, glass vials) | mix (bacteria, phages, fungi)                          | air supply and air exhaust          |
| I      | 27 | 3  | LN  | 16 | daily            | gN  | container                                   | mix (plant (leaves), animal (fish, mussels, dove egg)) | filtered air supply and air exhaust |
| I      | 28 | 3  | LN  | 16 | daily            | gN  | container                                   | mix (plant (leaves), animal (fish, mussels, dove egg)) | filtered air supply and air exhaust |
| I      | 29 | 3  | ice | 16 | daily            | gN  | container                                   | mix (plant (leaves), animal (fish, mussels, dove egg)) | filtered air supply and air exhaust |
| I      | 30 | 3  | ice | 16 | daily            | gN  | mix (glass flasks, scintillation vials)     | mix (plant (leaves), animal (fish, mussels, dove egg)) | filtered air supply and air exhaust |
| J      | 31 | 3  | LN  | 8  | every second day | mix | mix (straws, tubes, box, container)         | animal                                                 | air supply                          |
| NC ref | 33 | 4  | NC  | NC | NC               | NC  | NC                                          | NC                                                     | NC                                  |
| NC hep | 34 | 2  | NC  | NC | NC               | NC  | NC                                          | NC                                                     | NC                                  |
| NC B   | 35 | 2  | NC  | NC | NC               | NC  | NC                                          | NC                                                     | NC                                  |
| NC eq  | 0  | 15 | NC  |    |                  |     |                                             |                                                        |                                     |



**Table S2: Primer and protocols used for specific amplification**

| Primer                                           | Sequence (5'-)                                                                                                                                                                                                 | Literature                                         | Protocol                                                                                                            |
|--------------------------------------------------|----------------------------------------------------------------------------------------------------------------------------------------------------------------------------------------------------------------|----------------------------------------------------|---------------------------------------------------------------------------------------------------------------------|
| <b>Bacterial 16 S rRNA gene</b>                  |                                                                                                                                                                                                                |                                                    |                                                                                                                     |
| 8 F                                              | AGAGTTTGATCCTGGCTCA<br>G                                                                                                                                                                                       | (Turner et al. 1999)                               | 95°C 10 min, 34x (94°C 30 sec, 55°C 30 sec, 72°C 2 min 10 sec), 72°C 10 min)                                        |
| 1492 R                                           | GGTACCTTGTTACGACTT                                                                                                                                                                                             |                                                    |                                                                                                                     |
| <b>Bacterial 16 S r RNA gene, V3 Region</b>      |                                                                                                                                                                                                                |                                                    |                                                                                                                     |
| 341 F                                            | CCTACGGGWWGCWGCAG                                                                                                                                                                                              | (Muyzer et al. 1993)                               | 95°C 5 min, 50x (95°C 10 sec, 63°C 15 sec, 72°C 10 sec))                                                            |
| 515 R                                            | CCGCGGCTGCTGGCAC                                                                                                                                                                                               | (Cho et al. 1996)                                  |                                                                                                                     |
| <b>Mycoplasma 16 S rRNA gene</b>                 |                                                                                                                                                                                                                |                                                    |                                                                                                                     |
| 5' primer mix                                    | cgc ctg agt agt acg ttc gc<br>cgc ctg agt agt acg tac gc<br>tgc ctg ggt agt aca ttc gc<br>tgc ctg agt agt aca ttc gc<br>cgc ctg agt agt atg ctc gc<br>cac ctg agt agt atg ctc gc<br>cgc ctg ggt agt aca ttc gc | (Uphoff and Drexler 2002; Uphoff and Drexler 2013) | 1x (96°C 2 min, 65°C 1 min, 72°C 1 min), 35x (94°C 4 sec, 65°C 8 sec, 72°C 16 sec + 2 sec extension time per cycle) |
| primer mix                                       | gcg gtg tgt aca aga ccc ga<br>gcg gtg tgt aca aaa ccc ga<br>gcg gtg tgt aca aac ccc ga                                                                                                                         |                                                    |                                                                                                                     |
| <b>Line 1 (mouse, rabbit, rat, human) 290 bp</b> |                                                                                                                                                                                                                |                                                    |                                                                                                                     |
| Line 1 F                                         | CCATGCTCATSGATTGG                                                                                                                                                                                              | (Dobigny et al. 2004)                              | 94°C 10 min, 34x (94°C 30 sec, 55°C 30 sec, 72°C 1 min), 72°C 10 min)                                               |
| Line 1 R                                         | ATTCTRTTCCATTGGTCTA                                                                                                                                                                                            |                                                    |                                                                                                                     |
| <b>Fungi ITS</b>                                 |                                                                                                                                                                                                                |                                                    |                                                                                                                     |
| ITS1F 81735-1756 (18S)                           | CTTGGTCATTTAGAGGAAG<br>TAA                                                                                                                                                                                     | (Gardes and Bruns 1993)                            | 94°C 10 min, 32x (94°C 45 sec, 54°C 45 sec, 72°C 2 min), 72°C 10 min)                                               |
| ITS4 LSU 60-41                                   | TCCTCCGCTTATTGATATGC                                                                                                                                                                                           | (White TJ 1990)                                    |                                                                                                                     |

Cho J-C, Lee D-H, Cho Y-C, Cho J-C, Kim S-J (1996) Direct extraction of DNA from soil for amplification of 16S rRNA gene sequences by polymerase chain reaction. *The Journal of Microbiology* 34(3):229-235

Dobigny G, Ducroz J-F, Robinson TJ, Volobouev v (2004) Cytogenetics and Cladistics. *Systematic Biology* 53(3):470-484 doi:10.1080/10635150490445698

Gardes M, Bruns TD (1993) ITS primers with enhanced specificity for basidiomycetes - application to the identification of mycorrhizae and rusts. *Molecular Ecology* 2(2):113-118 doi:10.1111/j.1365-294X.1993.tb00005.x

Muyzer G, de Waal EC, Uitterlinden AG (1993) Profiling of complex microbial populations by denaturing gradient gel electrophoresis analysis of polymerase chain reaction-amplified genes coding for 16S rRNA. *Applied and Environmental Microbiology* 59(3):695-700

Turner S, Pryer KM, Miao VPW, Palmer JD (1999) Investigating Deep Phylogenetic Relationships among Cyanobacteria and Plastids by Small Subunit rRNA Sequence Analysis1. *Journal of Eukaryotic Microbiology* 46(4):327-338 doi:10.1111/j.1550-7408.1999.tb04612.x

Uphoff CC, Drexler HG (2002) Comparative PCR analysis for detection of mycoplasma infections in continuous cell lines. *In Vitro Cellular & Developmental Biology-Animal* 38(2):79-85

Uphoff CC, Drexler HG (2013) Detection of Mycoplasma Contaminations. In: Helgason CD, Miller CL (eds) *Basic Cell Culture Protocols*. Humana Press, Totowa, NJ, pp 1-13

White TJ BT, Lee S, Taylor (1990) Amplification and direct sequencing of fungal ribosomal RNA genes for phylogenetics. . In: Innis MA, Gelfand DH SJ, White TJ (eds) *PCR Protocols: a guide to methods and applications*. Academic Press, New York, USA, pp 315-322

**Table S3. Calculation of DNA content and cell counts and PCR success to determine the microbial load of liquid nitrogen (LN) storage tanks.** ID, identity number; A-J, Identification letter of each institute; N, number of replicates; SD, standard deviation; hu, human; fun, fungi; myc, *Mycoplasma*; PCR, polymerase chain reaction; NC eq, negative controls of laboratory equipment; hep, LN reference sample including HEPES buffer; ref, LN reference sample without HEPES buffer; Deb, Debris; nd, not determined; Nm, not measurable; code for PCR success: - negative, + positive, //, replicates ;\* significant above mean of all NCs  $p < 0.05$ ; \*\* significant above mean of all NCs  $p < 0.01$ .

| ID | Institute | phase | N  | cells per ml |         | copies per ml |         | DNA ng per $\mu$ l |           | PCR Success |             |             |
|----|-----------|-------|----|--------------|---------|---------------|---------|--------------------|-----------|-------------|-------------|-------------|
|    |           |       |    | mean         | SD      | mean          | SD      | mean               | SD        | hu          | fun         | myc         |
| 1  | A         | ice   | 3  | 5.7E+03      | 5.3E+03 | 7.3E+04       | 3.1E+04 | 0.52               | 0.04      | -/-         | -/-         | -/-         |
| 2  | A         | ice   | 3  | 3.9E+03*     | 1.5E+03 | 9.3E+04*      | 3.3E+04 | 0.57               | 0.03      | -/-         | -/-         | -/-         |
| 3  | A         | ice   | 3  | 3.9E+03      | 1.9E+03 | 3.6E+04*      | 9.9E+03 | 0.51               | 0.07      | -/-         | -/-         | -/-         |
| 4  | B         | ice   | 3  | 1.3E+04      | 7.6E+03 | 1.6E+06       | 2.8E+06 | 0.40               | 0.06      | -/-         | -/-         | -/-         |
| 5  | B         | LN    | 3  | 5.7E+01      | 4.2E+01 | 2.0E+02       | 1.4E+02 | 0.43               | 0.03      | -/-         | -/+         | +/-         |
| 6  | B         | ice   | 3  | 5.5E+03      | 5.5E+03 | 5.1E+04       | 6.1E+04 | 0.45               | 0.03      | -/-         | -/-         | -/-         |
| 7  | B         | LN    | 3  | 5.7E+01      | 4.1E+01 | 9.0E+01       | 2.6E+01 | 0.38               | 0.05      | -/-         | -/-         | +/-         |
| 36 | B         | Deb   | 1  | nd           | nm      | 9.5E+03       | nm      | 0.68               | nm        | +           | -           | -           |
| 37 | B         | Deb   | 1  | nd           | nm      | 5.4E+03       | nm      | 0.57               | nm        | -           | -           | -           |
| 8  | C         | ice   | 3  | 5.0E+03      | 2.0E+03 | 1.1E+04       | 7.6E+03 | 0.38               | 0.08      | -/-         | -/-         | -/-         |
| 9  | C         | ice   | 3  | 5.4E+03      | 2.2E+03 | 3.6E+04       | 3.5E+04 | 0.42               | 0.12      | -/-         | -/+         | -/-         |
| 10 | C         | ice   | 3  | 8.7E+03*     | 1.6E+03 | 1.1E+06       | 5.9E+05 | 1.34               | 0.88      | -/-         | +/+         | -/-         |
| 11 | C         | ice   | 3  | 1.6E+04      | 8.1E+03 | 1.9E+06       | 9.7E+05 | 1.29               | 0.40      | -/-         | +/-         | +/+         |
| 12 | D         | ice   | 3  | 4.2E+03      | 3.1E+03 | 7.9E+04**     | 8.2E+03 | 0.50               | 0.05      | -/-         | -/-         | -/-         |
| 13 | D         | LN    | 3  | 3.0E+01      | 2.0E+01 | 3.3E+01       | 7.9E+00 | 0.36               | 0.06      | -/-         | -/-         | -/-         |
| 14 | E         | LN    | 3  | 3.1E+01      | 2.0E+01 | 1.8E+01       | 5.9E+00 | 0.46               | 0.03      | -/-         | -/-         | -/-         |
| 15 | E         | LN    | 3  | 2.2E+01      | 5.5E+00 | 3.6E+01       | 2.4E+01 | 0.48               | 0.07      | -/-         | -/-         | -/-         |
| 16 | E         | LN    | 3  | 5.2E+01      | 4.2E+01 | 3.3E+01       | 7.2E+00 | 0.53               | 0.08      | -/-         | -/-         | -/-         |
| 17 | F         | ice   | 3  | 5.0E+03*     | 4.3E+03 | 3.9E+03       | 1.9E+03 | 0.63               | 0.06      | -/-         | +/+         | +/-         |
| 18 | F         | ice   | 3  | 3.9E+03      | 2.9E+03 | 1.9E+04*      | 5.5E+03 | 0.39               | 0.07      | -/-         | -/+         | -/+         |
| 19 | G         | LN    | 3  | 2.2E+01      | nm      | 1.0E+03       | 1.7E+03 | 0.44               | 0.06      | -/-         | -/-         | -/-         |
| 20 | G         | ice   | 3  | 2.8E+03      | 2.5E+03 | 4.5E+04       | 7.0E+04 | 3.82               | 1.62      | +/-         | -/-         | +/+         |
| 21 | H         | ice   | 3  | 9.2E+03      | 5.7E+03 | 6.6E+04       | 2.7E+04 | 0.38               | 0.03      | -/-         | -/-         | -/-         |
| 22 | H         | LN    | 3  | 3.7E+01      | 1.9E+01 | 2.5E+03*      | 5.9E+02 | 0.66               | 0.26      | -/-         | -/-         | -/+         |
| 23 | H         | LN    | 3  | 3.1E+01      | 8.6E+00 | 2.3E+01       | 5.2E+00 | 0.45               | 0.12      | -/-         | -/-         | -/-         |
| 24 | H         | ice   | 1  | nd           | nm      | 2.9E+06       | nm      | 0.37               | nm        | -           | -           | -           |
| 25 | H         | ice   | 3  | 9.2E+03*     | 3.2E+03 | 6.1E+04*      | 1.6E+04 | 0.37               | 0.01      | -/-         | -/-         | -/-         |
| 26 | H         | LN    | 3  | 1.3E+01      | 1.2E+01 | 3.8E+01       | 5.3E+00 | 0.39               | 0.03      | -/-         | -/-         | -/-         |
| 32 | H         | Deb   | 5  | 5.0E+04**    | 2.0E+04 | 7.9E+06*      | 8.0E+06 | 24.9<br>2          | 18.9<br>1 | -/-<br>/-   | +/+/<br>+/+ | +/+/<br>-/+ |
| 27 | I         | LN    | 3  | 2.2E+01      | 9.8E+00 | 2.8E+02       | 1.1E+02 | 1.04               | 0.59      | -/-         | -/-         | -/-         |
| 28 | I         | LN    | 3  | 3.0E+01      | 1.6E+01 | 6.1E+02       | 5.1E+02 | 4.41               | 3.54      | -/-         | -/+         | -/-         |
| 29 | I         | ice   | 3  | 1.5E+03*     | 3.2E+02 | 2.4E+05       | 1.0E+05 | 12.2<br>9          | 6.89      | -/+         | +/+         | +/+         |
| 30 | I         | ice   | 3  | 2.6E+03      | 3.2E+02 | nm            | nm      | 13.4<br>0          | 6.02      | -/-         | -/-         | +/-         |
| 31 | J         | LN    | 3  | 1.5E+01      | 1.6E+01 | 8.3E+01       | 1.3E+02 | 0.20               | 0.04      | -/-         | -/-         | -/-         |
| 33 | ref       | NC    | 2  | nd           | nm      | 1.6E+01       | 6.8E+00 | 0.41               | 0.06      | -/-<br>/-   | -/-         | -/-         |
| 34 | hep       | NC    | 2  | nd           | nm      | 3.0E+02       | 1.4E+01 | 0.38               | 0.02      | -           | -           | -           |
| 35 | B         | NC    | 2  | 1.8E+02      | 1.4E+02 | 1.2E+02       | 4.0E+01 | 0.17               | 0.08      | -           | -           | -           |
| 0  | eq        | NC    | 13 | 1.9E+02      | 1.9E+02 | 1.1E+02       | 1.2E+02 | 0.32               | 0.09      | -           | -           | -           |

**Table S4: Summary statistics of the cell counts and copy number by the sampled phase determined in liquid nitrogen storage (LN) tanks.** N, number of cases; sd, standard deviation; se, standard error; ci, 95%-confidence interval; Deb, Debris; NC B, exemplary negative control of institute B; NC B/hep/ref, exemplary NC of institute B/ LN reference sample including HEPES buffer/ LN reference sample without HEPES buffer.

|                               | <b>phase</b> | <b>N</b> | <b>counts</b> | <b>sd</b> | <b>se</b> | <b>ci</b> |
|-------------------------------|--------------|----------|---------------|-----------|-----------|-----------|
| <b>cells ml<sup>-1</sup></b>  | ice          | 49       | 6368          | 5059      | 723       | 1453      |
|                               | LN           | 36       | 34            | 24        | 4         | 8         |
|                               | Deb          | 6        | 43118         | 24431     | 9974      | 25639     |
|                               | NC B         | 2        | 180           | 137       | 97        | 1233      |
| <b>copies ml<sup>-1</sup></b> | ice          | 46       | 392768        | 944957    | 139326    | 280618    |
|                               | LN           | 39       | 380           | 802       | 128       | 260       |
|                               | Deb          | 8        | 5686196       | 6996596   | 2473670   | 5849301   |
|                               | NC B/hep/ref | 8        | 112           | 124       | 44        | 104       |

**Table S5: Summary of the generalized linear model with Gaussian distribution.** Effect of predictor variables (the institute, storage phase, surrounding condition, stored material, storage device, number of openings and the usage time) on a response variable (gene copies and cell numbers) after removing samples below the detection limit. The variables institutes, sampled phase (Debris), storage phase (LN = liquid nitrogen), surrounding condition (Air supply and air exhaust), number of openings, usage time predicted the occurrence of cells and copies. The effect of the variables storage material and storage device was redundant with the other variables. The estimate, standard error (SE), test statistic and p value of the model have been calculated. \*, significant intercept; Red, positive intercept; green, negative intercept.

| Predictor variable         | Response Variable |        |           |         |               |        |           |          |
|----------------------------|-------------------|--------|-----------|---------|---------------|--------|-----------|----------|
|                            | cells per ml      |        |           |         | copies per ml |        |           |          |
|                            | estimate          | SE     | statistic | p value | estimate      | SE     | statistic | p value  |
| Institute A (Intercept)    | 3.3315            | 1.2895 | 2.5836    | 0.0146* | -1.3511       | 2.8544 | -0.4733   | 0.6392   |
| Institute B                | 0.5330            | 0.8252 | 0.6459    | 0.5230  | 3.9462        | 1.8266 | 2.1604    | 0.0383*  |
| Institute C                | 3.1072            | 0.6771 | 4.5890    | 0.0001* | 7.1063        | 1.4988 | 4.7413    | 4.2E-05* |
| Institute D                | 3.1153            | 0.9079 | 3.4315    | 0.0017* | 8.8862        | 2.0096 | 4.4218    | 0.0001*  |
| Institute F                | 3.0519            | 0.9163 | 3.3307    | 0.0022* | 7.5415        | 2.0283 | 3.7181    | 0.0008*  |
| Institute G                | -0.0865           | 0.5553 | -0.1557   | 0.8772  | -0.2026       | 1.2293 | -0.1648   | 0.8701   |
| Institute H                | 2.3258            | 0.5499 | 4.2290    | 0.0002* | 3.8412        | 1.2174 | 3.1553    | 0.0035*  |
| Institute I                | -4.8709           | 1.2281 | -3.9663   | 0.0004* | -7.4364       | 2.7184 | -2.7356   | 0.0101*  |
| Phase: Debris              | 1.6703            | 0.5003 | 3.3387    | 0.0021* | 4.9787        | 1.1074 | 4.4957    | 0.0001*  |
| Storage: LN                | 1.4425            | 0.7353 | 1.9619    | 0.0585  | -0.6000       | 1.6276 | -0.3686   | 0.7148   |
| Air supply and air exhaust | -5.4767           | 1.5736 | -3.4803   | 0.0015* | -12.5818      | 3.4833 | -3.6120   | 0.0010*  |
| number of openings         | 3.5659            | 0.9445 | 3.7752    | 0.0007* | 10.1484       | 2.0909 | 4.8537    | 3.0E-05* |
| usage time                 | 0.3284            | 0.1000 | 3.2831    | 0.0025* | 0.6857        | 0.2214 | 3.0968    | 0.0041*  |



**Table S6. Results overview of the microbial load in liquid nitrogen (LN) storage tanks.** The table includes all samples above the determined detection limit in decreasing order of cell counts summarizing important metadata and results. ID, identity number; Deb, Debris; gN, gaseous phase of the LN storage tanks; F, PCR fungi; M, PCR *Mycoplasma*; -, negative; +, positive; <sup>1</sup>Risk group 1 and 2; <sup>2</sup>listed according to “Zentrale Kommission für die Biologische Sicherheit”; <sup>#1</sup>*Lactobacillus helveticus*; <sup>#2</sup>*Leuconostoc mesenteroides*, *Staphylococcus epidermidis*, *Staphylococcus equorum*, *Streptococcus pneumoniae*, *Streptococcus mitis*, *Streptococcus thermophilus*; <sup>#3</sup>*Staphylococcus epidermidis*, *Streptococcus pneumoniae*, *Streptococcus mitis*, *Streptococcus anginosus*, *Streptococcus agalactiae*, *Streptococcus sanguinis*, *Streptococcus mutans*, *Streptococcus thermophilus*; <sup>#4</sup>*Acinetobacter calcoaceticus*; <sup>#5</sup>*Pseudomonas stutzeri*; <sup>#6</sup>*Acinetobacter oleivorans*, *Flavobacterium succinicans*, *Flavobacterium psychrophilum*.

| Institute | ID | Sampled phase | in use (years) | Frequency of opening open | Storage phase | Storage device | Stored material               | Storage condition                   | F | M | Top 3 Genera                                                                                                      |
|-----------|----|---------------|----------------|---------------------------|---------------|----------------|-------------------------------|-------------------------------------|---|---|-------------------------------------------------------------------------------------------------------------------|
| H         | 32 | Deb           | 16             | daily                     | mix           | mix            | mix (bacteria, phages, fungi) | air supply and air exhaust          | + | + | <i>Elizabethkingia</i> <sup>1,2</sup> , <i>Empedobacter</i> <sup>1,2</sup> , <i>Janthibacterium</i>               |
| C         | 11 | ice           | 4              | every second day          | gN            | tubes          | animal (rodent)               | air exhaust                         | + | + | <i>Pseudomonas</i> <sup>1,2</sup> , <i>Pedobacter</i> , <i>Methylobacterium</i> <sup>2</sup>                      |
| B         | 4  | ice           | 7              | every second day          | LN            | straws         | animal (rodent)               | air exhaust                         | - | - | <i>Bacteroides</i> <sup>1,2</sup> , <i>Caldalkalibacillus</i> , <i>Psychrobacter</i> <sup>1</sup>                 |
| H         | 21 | ice           | 16             | daily                     | mix           | mix            | mix (bacteria, phages, fungi) | air supply and air exhaust          | - | - | <i>Psychrobacter</i> <sup>1</sup> , <i>Bacteroides</i> <sup>1,2</sup> , <i>Caldalkalibacillus</i>                 |
| H         | 25 | ice           | 5              | every second day          | mix           | tubes          | mix (human, animal)           | air exhaust                         | - | - | <i>Bacteroides</i> <sup>1,2</sup> , <i>Methylobacterium</i> <sup>2</sup> , <i>Caldalkalibacillus</i>              |
| C         | 10 | ice           | 3              | every second day          | gN            | tubes          | animal (rodent)               | air exhaust                         | + | - | <i>Pedobacter</i> , <i>Pseudomonas</i> <sup>1,2</sup> , <i>Methylobacterium</i> <sup>2</sup>                      |
| A         | 1  | ice           | 9              | every second day          | gN            | bags           | human                         | filtered air supply                 | - | - | <i>Bacteroides</i> <sup>1,2</sup> , <i>Caldalkalibacillus</i> , <i>Lactobacillus</i> <sup>1,2,#1</sup>            |
| B         | 6  | ice           | 1              | every second day          | LN            | straws         | animal (rodent)               | air exhaust                         | - | - | <i>Bacteroides</i> <sup>1,2</sup> , <i>Caldalkalibacillus</i> , <i>Psychrobacter</i> <sup>1</sup>                 |
| C         | 9  | ice           | 5              | every second week         | gN            | tubes          | animal (rodent)               | air exhaust                         | + | - | <i>Methylobacterium</i> <sup>2</sup> , <i>Bacteroides</i> <sup>1,2</sup> , <i>Caldalkalibacillus</i>              |
| C         | 8  | ice           | 6              | every second week         | gN            | tubes          | animal (rodent)               | air exhaust                         | - | - | <i>Streptococcus</i> <sup>1,2</sup> , <i>Staphylococcus</i> <sup>1,2</sup> , <i>Leuconostoc</i> <sup>1,2,#2</sup> |
| F         | 17 | ice           | 3              | seldom                    | LN            | tubes          | plant                         | filtered air supply and air exhaust | + | + | <i>Bacteroides</i> <sup>1,2</sup> , <i>Propionibacterium</i> <sup>1,2</sup> , <i>Enhydrobacter</i>                |
| D         | 12 | ice           | 5              | once a month              | gN            | bags           | human                         | filtered air supply                 | - | - | <i>Methylobacterium</i> <sup>2</sup> , <i>Bacteroides</i> <sup>1,2</sup> ,                                        |

|   |    |     |    |                     |     |           |                                                           |                                        |   |   |                                                                                                                           |
|---|----|-----|----|---------------------|-----|-----------|-----------------------------------------------------------|----------------------------------------|---|---|---------------------------------------------------------------------------------------------------------------------------|
|   |    |     |    |                     |     |           |                                                           |                                        |   |   | <i>Enhydrobacter</i>                                                                                                      |
| A | 2  | ice | 4  | daily               | gN  | bags      | human                                                     | filtered air supply                    | - | - | <i>Paracoccus</i> <sup>1,2</sup> , <i>Streptococcus</i> <sup>1,2</sup> ,<br><i>Staphylococcus</i> <sup>1,2, #3</sup>      |
| A | 3  | ice | 4  | daily               | gN  | bags      | human                                                     | filtered air supply                    | - | - | <i>Streptococcus</i> <sup>1,2</sup> , <i>Staphylococcus</i> <sup>1,2</sup> ,<br><i>Paracoccus</i> <sup>1,2, #3</sup>      |
| F | 18 | ice | 5  | seldom              | mix | mix       | mix (plant, human)                                        | filtered air supply<br>and air exhaust | + | + | <i>Methylobacterium</i> <sup>2</sup> , <i>Enhydrobacter</i> ,<br><i>Acinetobacter</i> <sup>1,2, #4</sup>                  |
| G | 20 | ice | 10 | every second<br>day | gN  | tubes     | mix (human, animal (rodent,<br>pig, monkey), plant)       | hall                                   | - | + | <i>Flavobacterium</i> <sup>(2)</sup> , <i>Pseudomonas</i> <sup>1,2</sup> ,<br><i>Propionibacterium</i> <sup>1,2, #5</sup> |
| I | 30 | ice | 16 | daily               | gN  | mix       | mix (plant (leaves), animal<br>(fish, mussels, dove egg)) | filtered air supply<br>and air exhaust | - | + | <i>Flavobacterium</i> <sup>(2)</sup> , <i>Pseudomonas</i> <sup>1,2</sup> ,<br><i>Acinetobacter</i> <sup>1,2, #6</sup>     |
| I | 29 | ice | 16 | daily               | gN  | container | mix (plant (leaves), animal<br>(fish, mussels, dove egg)) | filtered air supply<br>and air exhaust | + | + | <i>Methylobacterium</i> <sup>2</sup> , <i>Acinetobacter</i> <sup>1,2</sup> ,<br><i>Bacillus</i> <sup>1,2*</sup>           |

**Table S7. Statistic of  $\alpha$ -diversity measures (observed phylotypes, Chao1 and Shannon diversity index) determined in liquid nitrogen (LN) storage tanks after excluding the samples below the determined background . The significance of differences of the  $\alpha$ -diversity measures between the different observations of each parameter were calculated (by ANOVA) and shown as compact letter display. A-J, Identification letter of each institute; Deb, Debris; gN, gaseous phase of the LN storage tanks.**

| Parameter         | Observation                         | Observed | Chao | Shannon |
|-------------------|-------------------------------------|----------|------|---------|
| Institute         | A                                   | b        | c    | c       |
|                   | B                                   | a        | b    | b       |
|                   | C                                   | ab       | bc   | b       |
|                   | D                                   | a        | ab   | a       |
|                   | F                                   | b        | c    | bc      |
|                   | G                                   | b        | ac   | abc     |
|                   | H                                   | ab       | bc   | bc      |
|                   | I                                   | ab       | bc   | bc      |
| Opening frequency | daily                               | b        | ab   | b       |
|                   | every second day                    | ab       | a    | b       |
|                   | every second week                   | ab       | ab   | b       |
|                   | once a month                        | a        | a    | a       |
|                   | seldom                              | b        | b    | b       |
| Storage condition | air exhaust                         | a        | a    | a       |
|                   | air supply and air exhaust          | ab       | a    | a       |
|                   | filtered air supply                 | ab       | ab   | a       |
|                   | filtered air supply and air exhaust | ab       | ab   | a       |
|                   | hall                                | b        | a    | a       |
| Stored material   | animal                              | a        | a    | a       |
|                   | human                               | ab       | ab   | ab      |
|                   | mix                                 | ab       | ab   | ab      |
| Storage device    | bags                                | bc       | ab   | a       |
|                   | container                           | a        | ab   | a       |
|                   | mix                                 | ac       | ab   | b       |
|                   | straws                              | ab       | a    | a       |
|                   | tubes                               | c        | b    | a       |
| Storage phase     | gN                                  | a        | a    | a       |
|                   | LN                                  | a        | a    | a       |
|                   | mix                                 | a        | a    | a       |
| Sampled phase     | ice                                 | b        | b    | b       |
|                   | Deb                                 | a        | a    | a       |
